# Supplementary material for: High-g-factor phase-matched circular dichroism of second harmonic generation in chiral polar liquids
Source: Royal Society of Chemistry journal article supplement (doi:10.1039/d3tc00981e), 2023-01-01
Supplement: d3tc00981e1.pdf [file d3tc00981e1.pdf]

## Supplementary Information

### High-g-Factor Phase-Matched Circular Dichroism of Second Harmonic Generation in Chiral Polar Liquids

*Xiuhu Zhao<sup>a</sup>, Jinxing Li<sup>a</sup>, Mingjun Huang<sup>a,b</sup>, Satoshi Aya<sup>\*,a,b</sup>*

*a.* South China Advanced Institute for Soft Matter Science and Technology Advanced Institute for Soft Matter Science and Technology (AISMSST), School of Emergent Soft Matter, South China University of Technology, Guangzhou, 510640, P. R. China  
E-mail: [satoshiaya@scut.edu.cn](mailto:satoshiaya@scut.edu.cn) (SA)

*b.* Guangdong Provincial Key Laboratory of Functional and Intelligent Hybrid Materials and Devices, South China University of Technology, Guangzhou, 510640, P. R. China

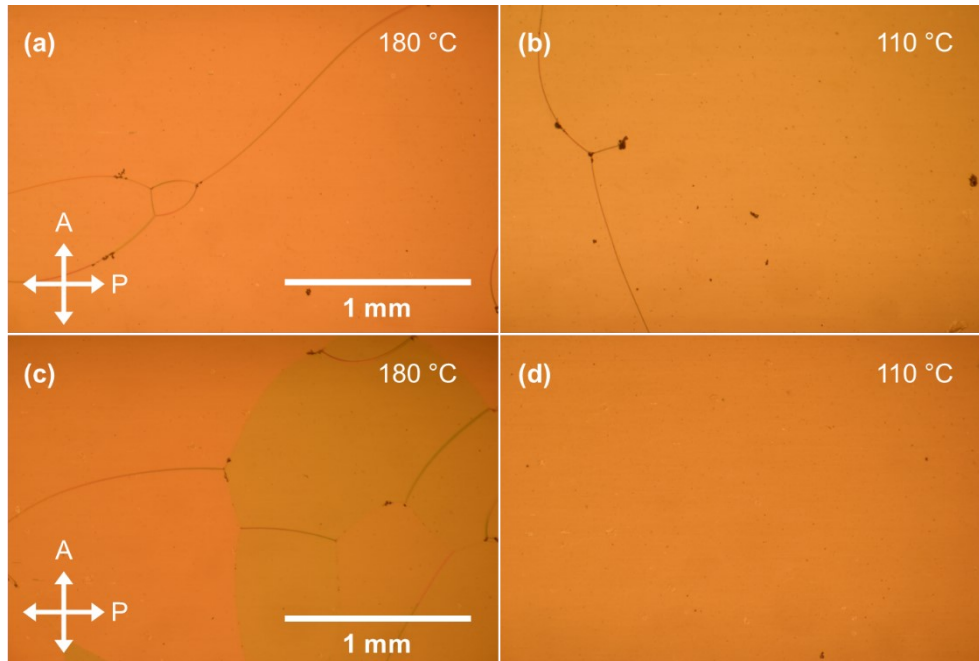

**Fig. S1** The PLM texture of two HN\* in a 50  $\mu\text{m}$  thickness cell. (a) and (b) the texture of 1.1%R811/RM734 at 180  $^{\circ}\text{C}$  and 110  $^{\circ}\text{C}$ , respectively; (c) and (d) the texture of 1.1%S811/RM734 at 180  $^{\circ}\text{C}$  and 110  $^{\circ}\text{C}$ , respectively. The scale bar is 1 mm.

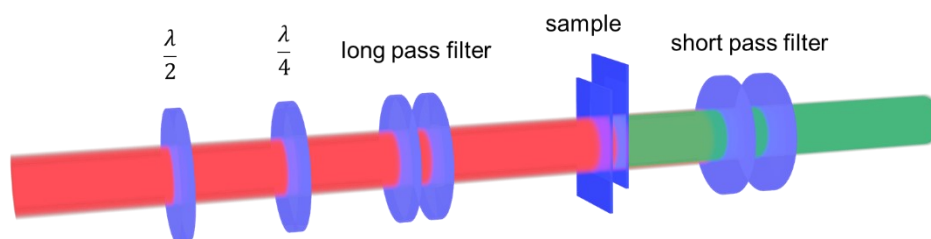

**Fig. S2** The optical path for SHG measurement.  $\lambda/2$  and  $\lambda/4$  represent the half-wave plate and quarter-wave plate, respectively.

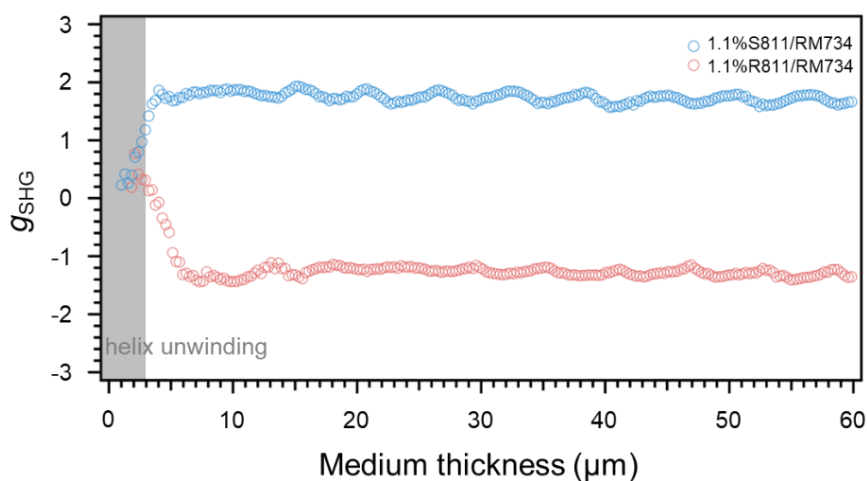

**Fig. S3** The thickness dependencies of the  $g$ -factor of right-handed HN\* 1.1%R811/RM734 and left-handed HN\* 1.1%S811/RM734, respectively. The gray part indicates the thinnest part of the wedge-shaped cell (0~3  $\mu\text{m}$ ), where the polarization field is in the unwinding state, and the SHG-CD effect is neglectable. Also, some defects are seen in this area, causing some fluctuations of  $g$ -factor.

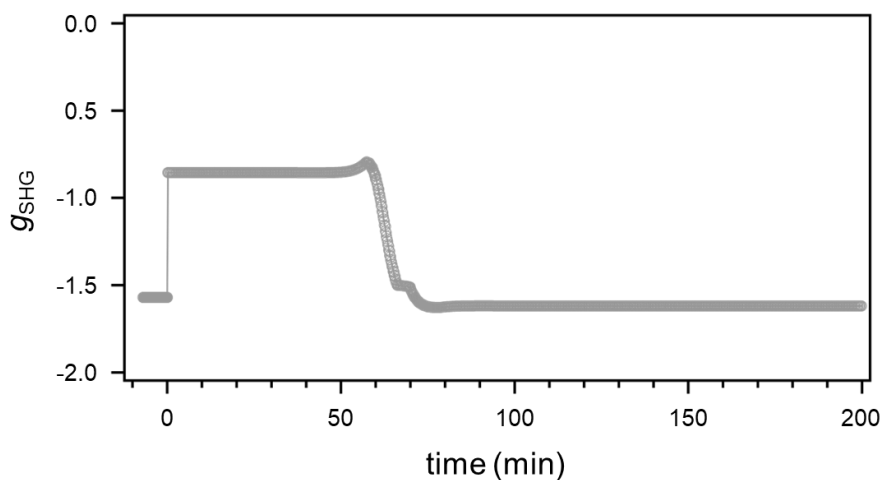

**Fig. S4** The  $g$ -factor of 1.1%R811/RM734 under a DC electric field of 1  $\text{mV}/\mu\text{m}$ . The  $g$ -factor is calculated by first smoothing the SH signal under the electric field.

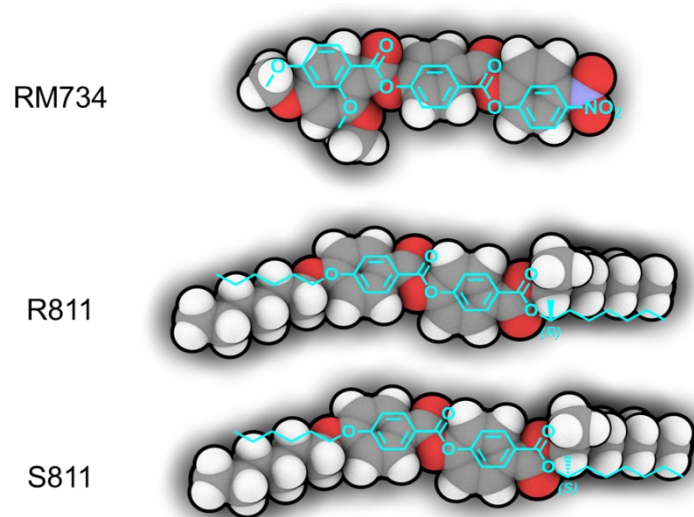

**Fig. S5** Molecular structure of  $N_F$  liquid crystal RM734, chiral dopant R811 and S811.
